# Supplementary material
Source: PubMed Central journal article supplement (PMC1838665)

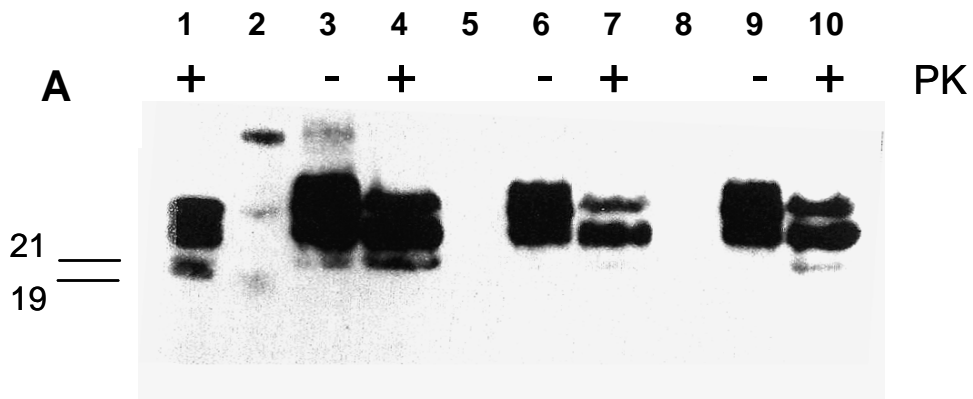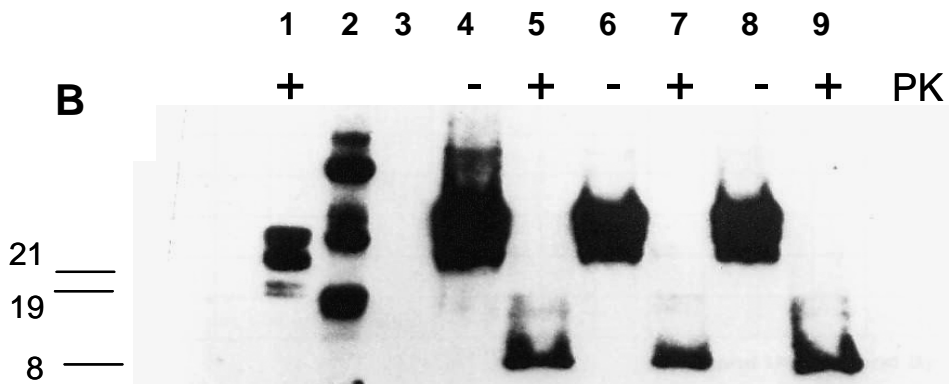

Supplement: pnas_0609241104_1.pdf [file pnas_0609241104_1.pdf]

**A**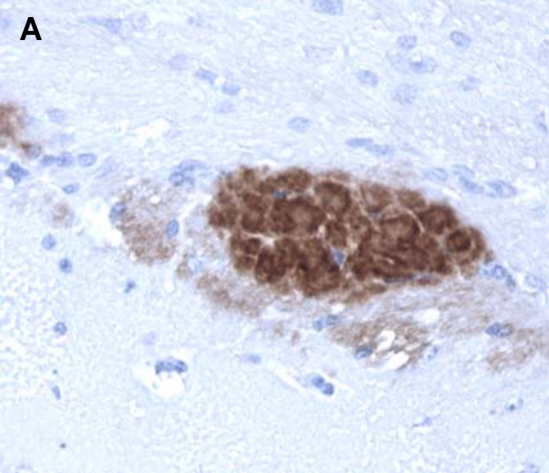**B**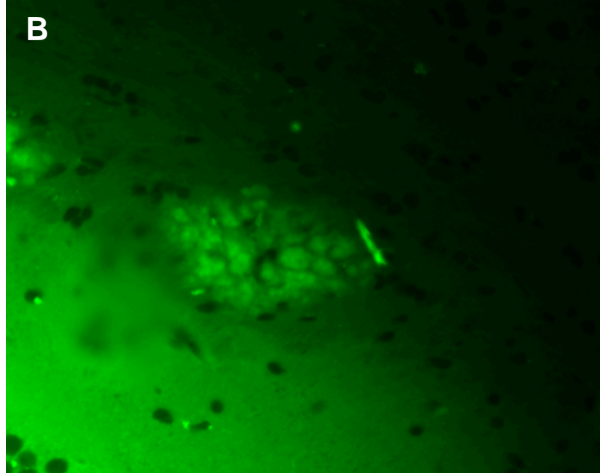

Supplement: pnas_0609241104_2.pdf [file pnas_0609241104_2.pdf]

1 2 3 4 5 6 7 8 9 10

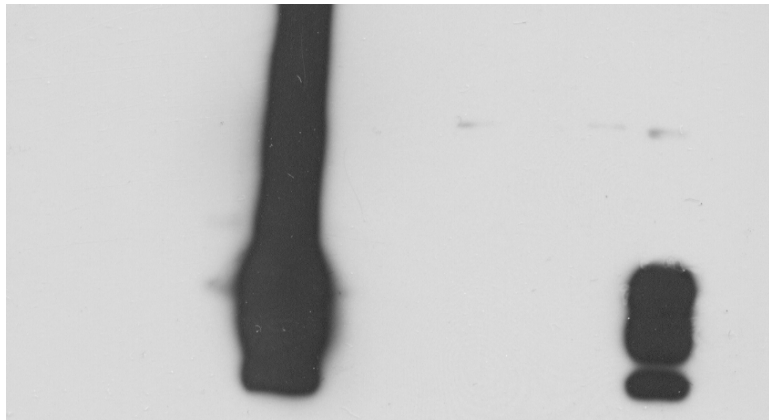

— 30kDa

Supplement: pnas_0609241104_3.pdf [file pnas_0609241104_3.pdf]

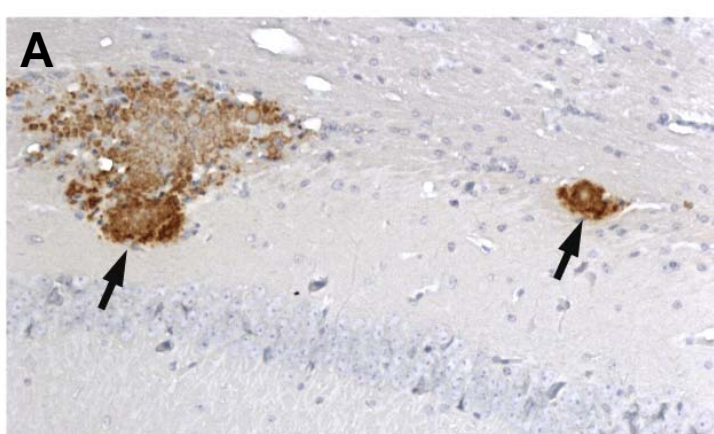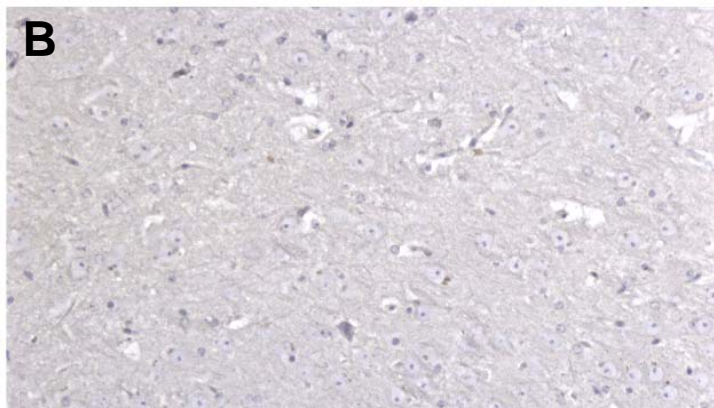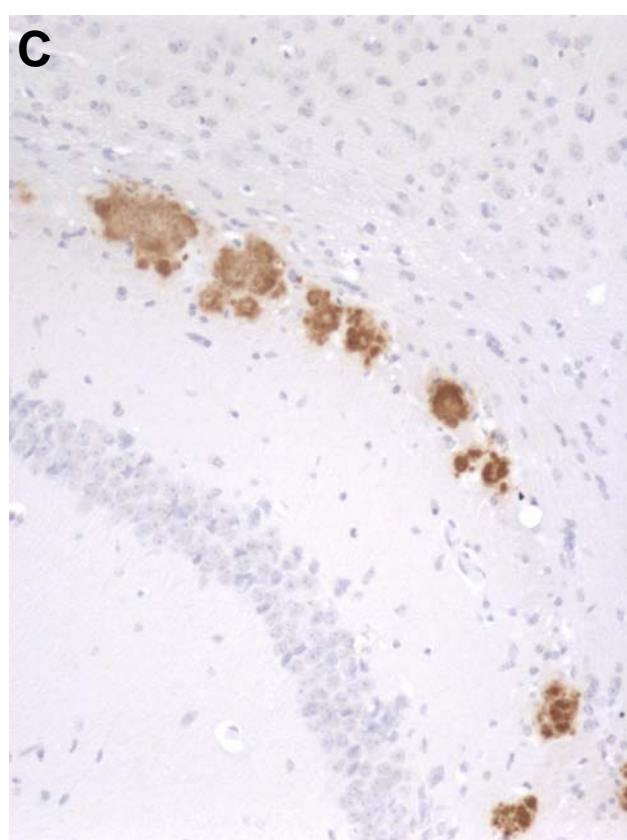

Supplement: pnas_0609241104_4.pdf [file pnas_0609241104_4.pdf]
